# Supplementary material
Source: PubMed Central journal article supplement (PMC2823461)

**Supplementary figure 1. FheCL1 has no affect on MyD88-dependent signalling from macrophages** Peritoneal macrophages isolated 2h after a single 50µl i.p injection of either FheCL1 (1mg/ml) or PBS were stimulated for 12hrs *in vitro* with (A) the TLR9 ligand CpG (1µM), (B) the synthetic TLR2 ligand Pam<sub>3</sub>Cys-Ser-(Lys)<sub>4</sub> (10ng/ml) and (C) the TLR5 ligand flagellin (10ng/ml). Cell supernatants were then analysed by ELISA to measure the quantity of IL-6, TNFα or IL-10 in culture media. Indicated values are the means ± SE of triplicates and are representative of three individual experiments.

**Supplementary figure 2. Cathepsin B from *S. mansoni* inhibits IFNβ dependent activation of macrophages.** (A) Peritoneal macrophages isolated 2h after a single 50µl i.p injection of either SmB1 (1mg/ml) or PBS were stimulated *in vitro* with either CpG (1µM), LPS (1µg/ml) or Poly I:C (25µg/ml). Cell supernatants were then analysed by ELISA or Greiss assay for the presence of IL-12, TNFα or nitrite. Data shown are the means ± SE of triplicates and are representative of two individual experiments. (B) Activated cells were also lysed and examined by RT-PCR for levels of mRNA expression of IL-12, TNFα or iNOS. Amplification products shown are representative of two separate experiments.

Supplementary Figure 1

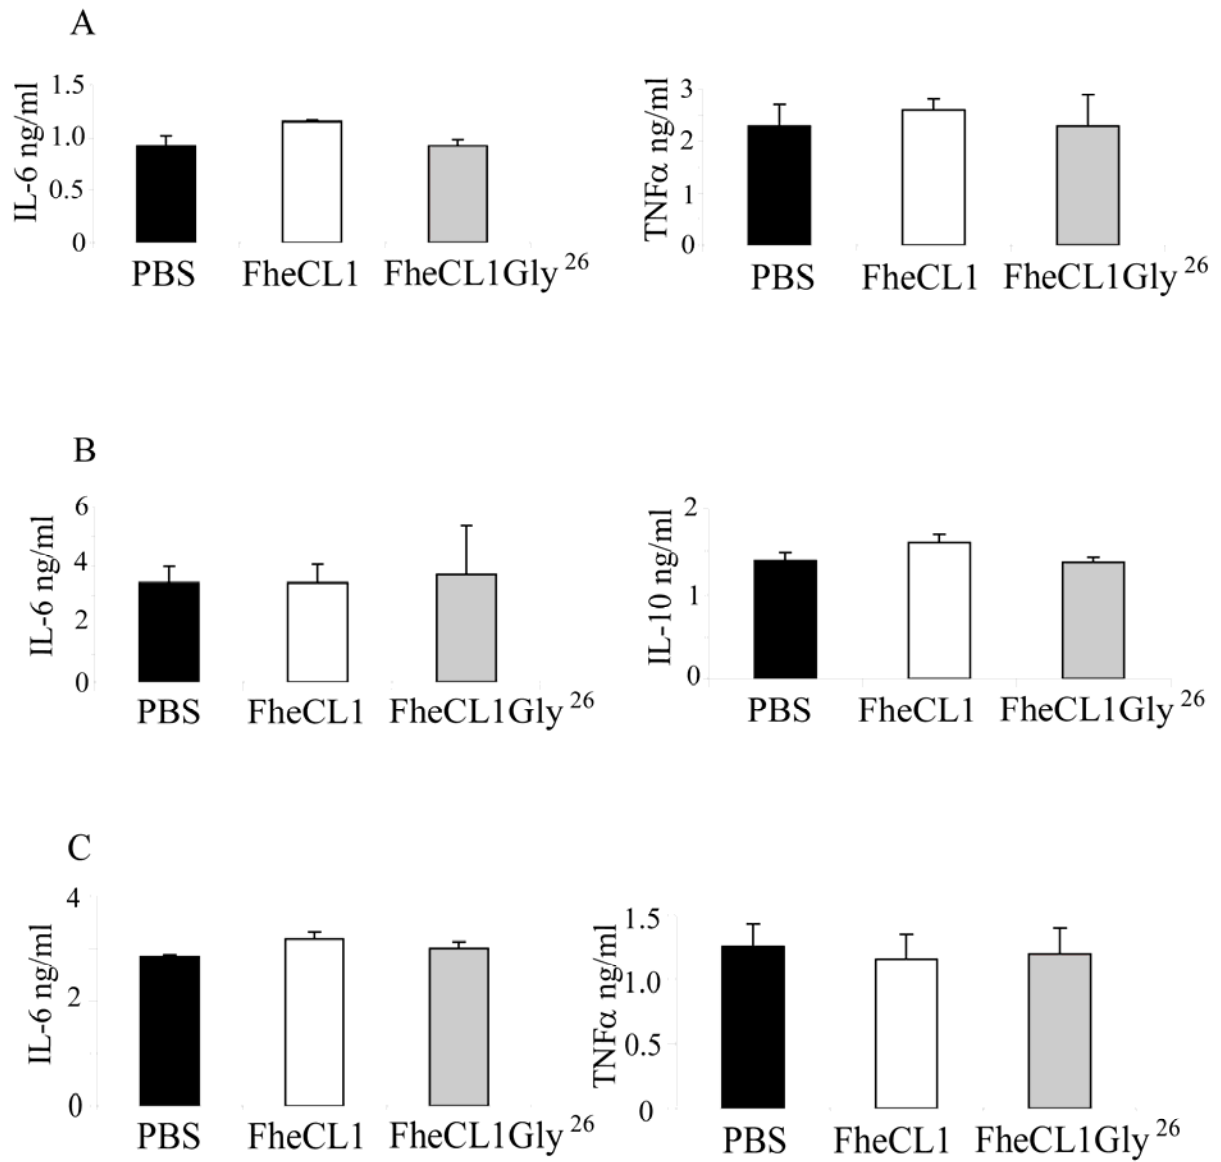

Supplementary Figure 2

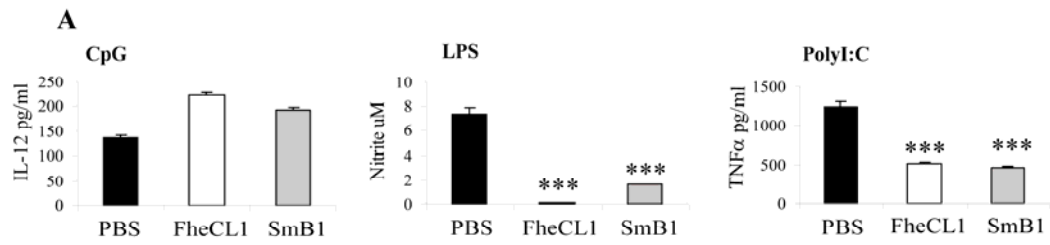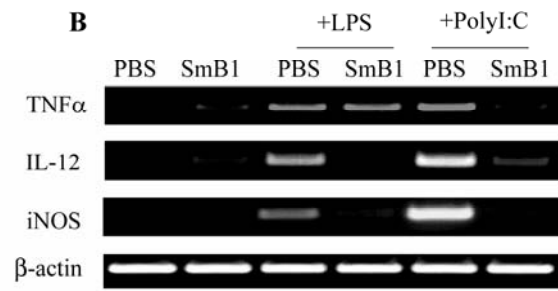

Supplement: supp_M109.060368_jbc.M109.060368-1.pdf [file supp_M109.060368_jbc.M109.060368-1.pdf]
